# Supplementary material for: Correlating the excited state relaxation dynamics as measured by photoluminescence and transient absorption with the photocatalytic activity of Au@TiO2core–shell nanostructures
Source: Royal Society of Chemistry journal article supplement (doi:10.1039/c2cp43666c), 2012-12-13
Supplement: c2cp43666c.pdf [file c2cp43666c.pdf]

## Supporting Information

### Correlating the excited state relaxation dynamics as measured by photoluminescence and transient absorption with the photocatalytic activity of Au@TiO<sub>2</sub> core-shell nanostructures

Robert J. Dillon, Ji Bong Joo, Francisco Zaera, Yadong Yin, and Christopher J. Bardeen\*

Department of Chemistry  
University of California, Riverside  
Riverside, CA 92521

\*christopher.bardeen@ucr.edu

#### Contents:

1. Preparation of Au@TiO<sub>2</sub> yolk-shell samples
  - a. Au nanoparticle synthesis
  - b. Au@SiO<sub>2</sub> synthesis
  - c. Au@SiO<sub>2</sub>@TiO<sub>2</sub> synthesis
  - d. Au@SiO<sub>2</sub>@TiO<sub>2</sub>@SiO<sub>2</sub> synthesis and calcination
  - e. Partial etching and recalcination for controlling TiO<sub>2</sub> crystallinity
2. Additional TEM images
3. Powder x-ray diffraction vs. crystallinity
4. Hydrogen production vs. crystallinity
5. Hg Lamp Spectrum

## 1. Preparation of Au@TiO<sub>2</sub> yolk-shell samples

### a. Au nanoparticle synthesis:

An aqueous solution of HAuCl<sub>4</sub>·3H<sub>2</sub>O (2.54 M, 18 μL) was added to deionized water (30 mL) and heated to boiling point (100°C). A sodium citrate solution (3 wt%, 1 mL) was added, and the resulting mixture was kept for 30 min under stirring. Upon cooling down to room temperature, an aqueous PVP solution (Mw, 40,000, 12.8 mg/mL, 0.235 mL) was added and the solution was kept overnight under stirring to allow for the adsorption of PVP on the Au surface. The Au nanoparticles were separated from the solution by centrifugation, and re-dispersed in water (5 mL).

### b. Au@SiO<sub>2</sub> synthesis:

The above-mentioned PVP treated Au solution (1 mL) was sequentially mixed with water (3.3 ml), ethanol (23 mL), Tetraethyl orthosilicate (TEOS, 0.86 mL) and an aqueous solution of ammonia (28%, 0.62 mL). The reaction mixture was stirred for 4 h at room temperature, and then the resulting Au@SiO<sub>2</sub> particles were separated by centrifuging and washed three times with ethanol. Finally, the particles were re-dispersed in ethanol (20 ml) under sonication.

### c. Au@SiO<sub>2</sub>@TiO<sub>2</sub> synthesis:

The above-mentioned Au@SiO<sub>2</sub> solution (20 ml) was dispersed in a mixture containing hydroxypropyl cellulose (HPC 400 mg), ethanol (80 mL) and water (0.48 mL). After reaction mixture had been stirred for 30 min, a solution of tetrabutyl titanate (TBOT, 4 ml) dissolved in ethanol (18 mL) was slowly added to the above solution using a syringe pump (0.5 mL/min). After injection, the temperature was increased to 85 °C while the reaction mixture was stirred for

90 min under reflux conditions. The precipitate which contained Au@SiO<sub>2</sub>@TiO<sub>2</sub> nanocomposites, was collected using centrifugation, washed with ethanol and re-dispersed in the deionized water (40 mL). PVP (M<sub>w</sub>, 40,000, 0.8 g) was added into the solution and it was kept overnight under stirring to allow for the adsorption of PVP on the TiO<sub>2</sub> surface. The Au@SiO<sub>2</sub>@TiO<sub>2</sub> particles were separated using centrifugation, washed and re-dispersed in ethanol (20 mL).

d. Au@SiO<sub>2</sub>@TiO<sub>2</sub>@SiO<sub>2</sub> synthesis and calcination:

The above-mentioned PVP treated Au@SiO<sub>2</sub>@TiO<sub>2</sub> solution (20 mL) was sequentially mixed with water (17.2 ml), ethanol (72 mL), Tetraethyl orthosilicate (TEOS, 3.44 mL) and an aqueous solution of ammonia (28%, 2.48 mL). The reaction mixture was stirred for 4 h at room temperature, and then the resulting Au@SiO<sub>2</sub>@TiO<sub>2</sub>@SiO<sub>2</sub> particles were separated by centrifuging, washed three times with ethanol and dried under vacuum. The sample is finally calcined in air at 800°C for 4 h to crystallize the amorphous TiO<sub>2</sub> to small anatase TiO<sub>2</sub> grains. Both of inner and outer silica layers were completely etched out by using NaOH solution at 90°C (Ref. Adv. Funct. Mater., 2012, 22, 166-174) and the Au@TiO<sub>2</sub> sample (sample A) was obtained after centrifuging and washing step.

c. Partial etching and recalcination for controlling TiO<sub>2</sub> crystallinity

The above calcined Au@SiO<sub>2</sub>@TiO<sub>2</sub>@SiO<sub>2</sub> particles (170 mg) were dispersed in 30 mL of water under ultrasonication and etched with NaOH solution (typically, 0.5 mL, 2.5 M) at 90 °C for 1 h. During the etching process, the silica layers were dissolved out preferentially near or inside the TiO<sub>2</sub> layer and it produce a small gap between SiO<sub>2</sub> and TiO<sub>2</sub> layers which allows space for the TiO<sub>2</sub> to further grow into large crystal grain (Ref., Energy Environ. Sci., 2012, 5, 6321-6327). The partially etched Au@SiO<sub>2</sub>@TiO<sub>2</sub>@SiO<sub>2</sub> particles were then isolated by centrifugation, washed with de-ionized water and ethanol, dried under vacuum, re-calcined in air at the desired temperature for a certain period (e. g. 4 or 16 h) to enhance the crystallinity of the TiO<sub>2</sub>. Sample B was re-calcined at 700°C for 4 h, Sample C was re-calcined at 800°C for 4h, and Sample D was re-calcined at 800°C for 16 h. The samples were then finally etched in a mixture of water (30 mL) and NaOH (2 mL, 2.5 M) at 90° C for 2 h to completely remove the silica. The samples isolated by centrifugation, washed with de-ionized water and ethanol, and dried.

## 2. Additional TEM images

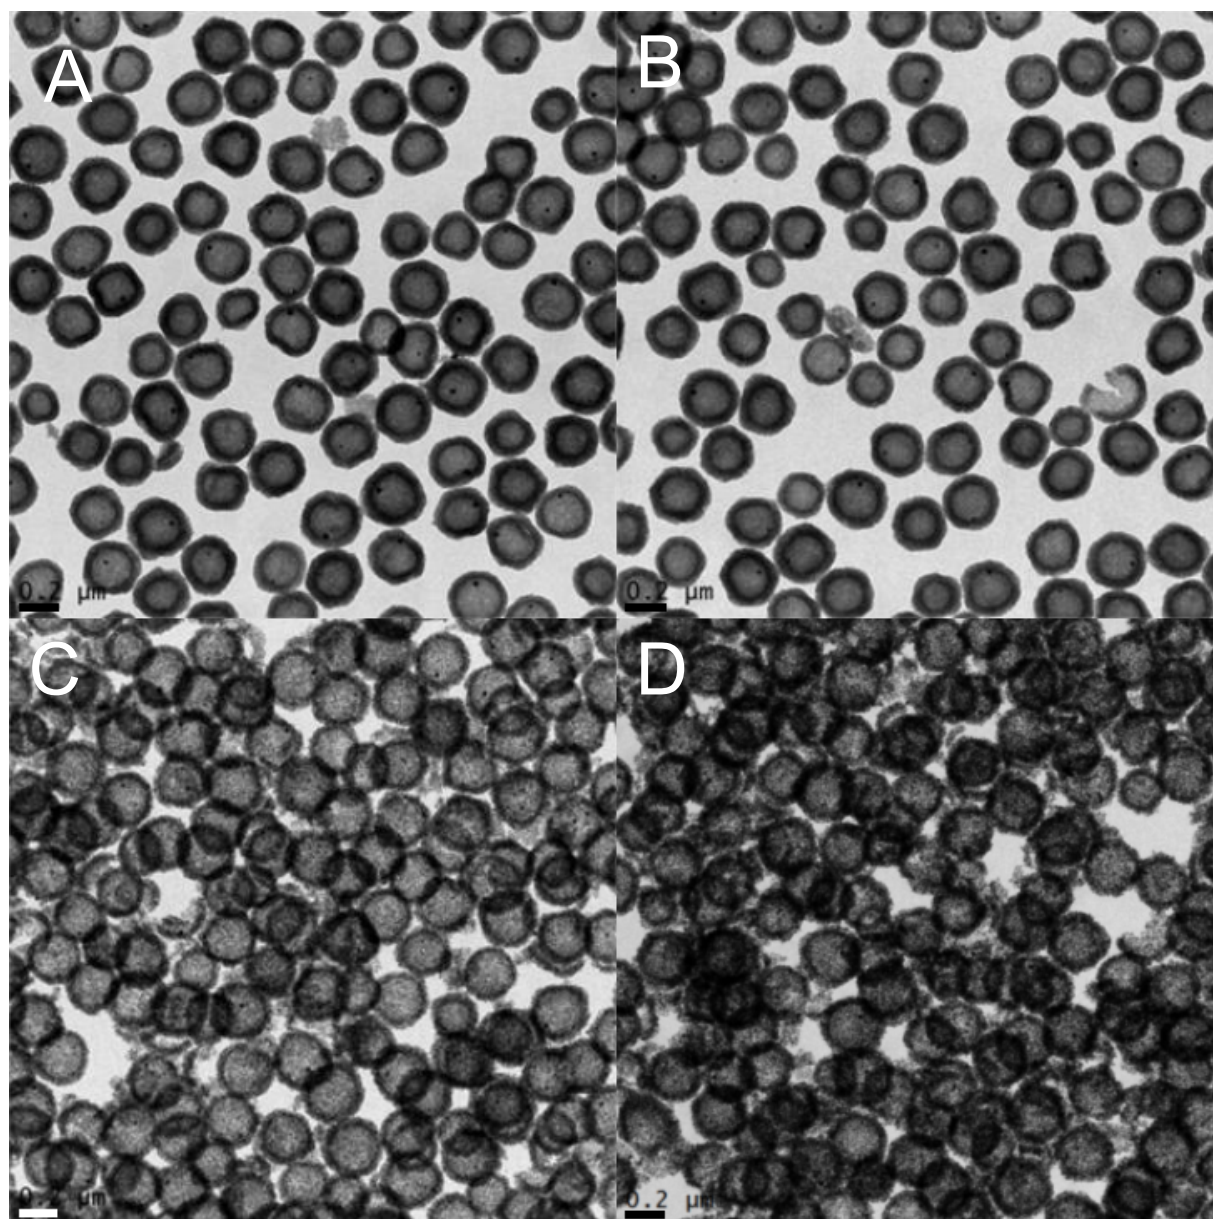

**Figure S1:** Zoomed out TEM of the Au@TiO<sub>2</sub> samples A-D. The scale bar is 0.2 μm.

### 3. Powder x-ray diffraction vs. crystallinity

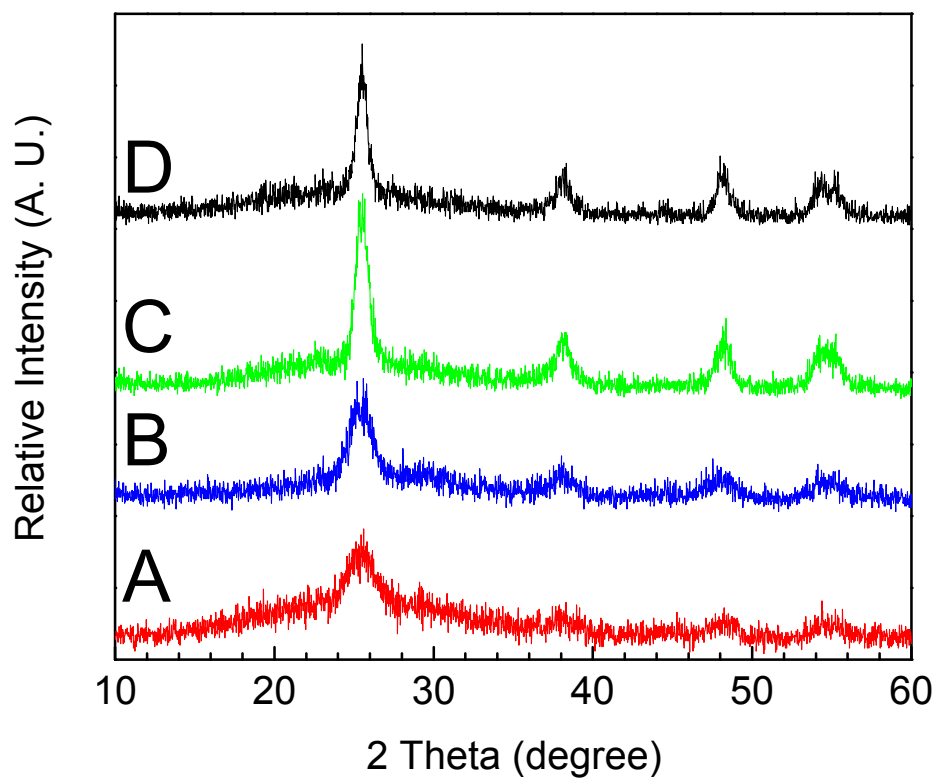

**Figure S2:** The powder x-ray diffraction spectra for each sample. The crystallinity increases from A to D, with a powder pattern indicative of anatase TiO<sub>2</sub>.

#### 4. H<sub>2</sub> production vs. crystallinity

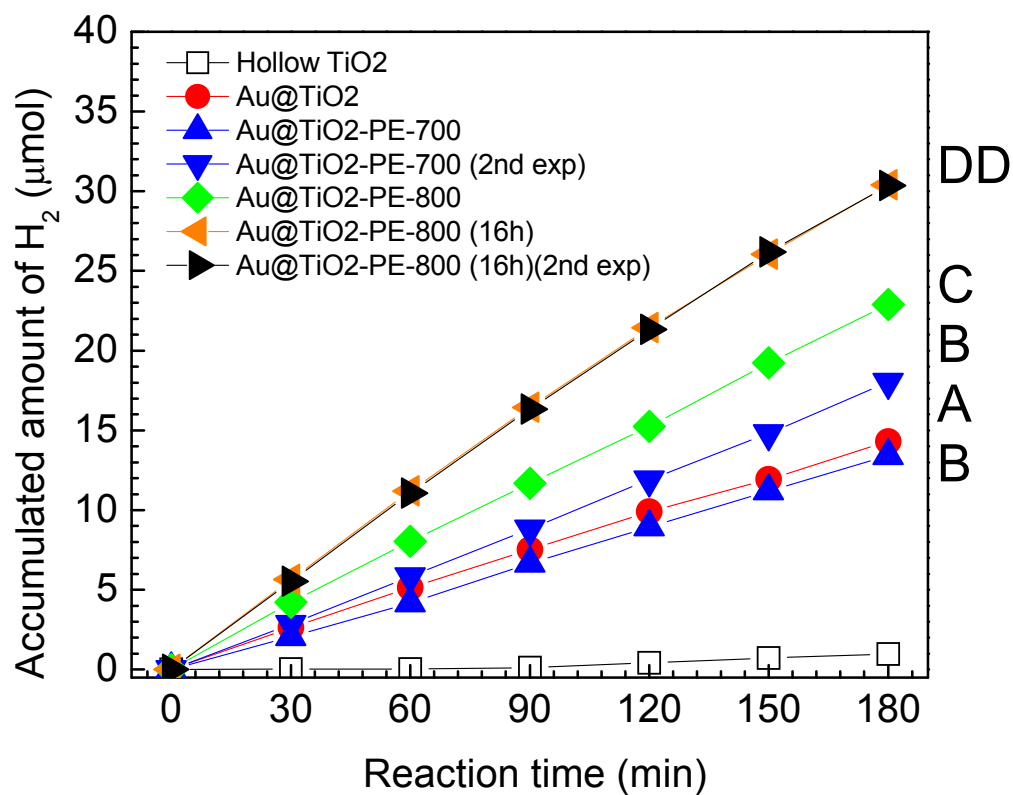

**Figure S3:** The accumulated hydrogen over time for each sample as well as comparison to TiO<sub>2</sub> without any gold. Some experiments were performed twice.

## 5. Hg Lamp Spectrum

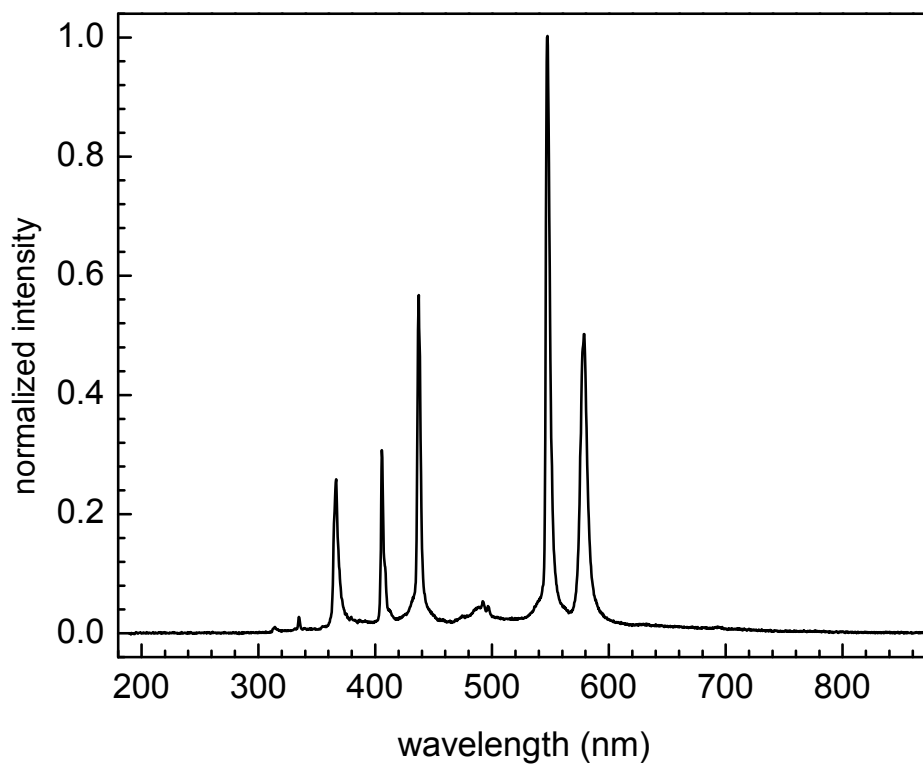

**Figure S4:** The spectrum of the Hg lamp used for the photocatalysis measurements. The lamp power was  $2.26 \text{ mW/mm}^2$ .
